# Supplementary material for: Hypoxia and Activation of Neutrophil Degranulation-Related Genes in the Peripheral Blood of COVID-19 Patients
Source: MDPI journal article supplement (doi:10.3390/v16020201), 2024-01-28
Supplement: s1 [file s1]

Supplementary Table S2 Top 20 pathways with significant enrichment from ToppGene analysis.

| Pathway |         |                                      |                                      |           |           |           |            |                    |                     |
|---------|---------|--------------------------------------|--------------------------------------|-----------|-----------|-----------|------------|--------------------|---------------------|
|         | ID      | Name                                 | Source                               | pValue    | FDR B&H   | FDR B&Y   | Bonferroni | Genes from Input   | Genes in Annotation |
| 1       | M27620  | REACTOME NEUTROPHIL DEGRANULATION    | <a href="#">Reactome Pathways</a>    | 2.112E-35 | 3.964E-32 | 3.217E-31 | 3.964E-32  | <a href="#">60</a> | <a href="#">478</a> |
| 2       | MM15330 | REACTOME NEUTROPHIL DEGRANULATION    | <a href="#">Reactome Pathways</a>    | 2.699E-30 | 2.533E-27 | 2.056E-26 | 5.066E-27  | <a href="#">57</a> | <a href="#">522</a> |
| 3       | M5336   | REACTOME CELL CYCLE MITOTIC          | <a href="#">Reactome Pathways</a>    | 2.654E-13 | 1.660E-10 | 1.347E-9  | 4.981E-10  | <a href="#">38</a> | <a href="#">560</a> |
| 4       | M543    | REACTOME CELL CYCLE                  | <a href="#">Reactome Pathways</a>    | 5.368E-13 | 2.382E-10 | 1.933E-9  | 1.008E-9   | <a href="#">42</a> | <a href="#">692</a> |
| 5       | MM15332 | REACTOME ANTIMICROBIAL PEPTIDES      | <a href="#">Reactome Pathways</a>    | 6.345E-13 | 2.382E-10 | 1.933E-9  | 1.191E-9   | <a href="#">15</a> | <a href="#">70</a>  |
| 6       | M39650  | WP CELL CYCLE                        | <a href="#">WikiPathways</a>         | 1.916E-12 | 5.995E-10 | 4.865E-9  | 3.597E-9   | <a href="#">18</a> | <a href="#">120</a> |
| 7       | M7963   | KEGG CELL CYCLE                      | <a href="#">KEGG Legacy Pathways</a> | 3.919E-12 | 1.051E-9  | 8.528E-9  | 7.356E-9   | <a href="#">18</a> | <a href="#">125</a> |
| 8       | M16647  | REACTOME CELL CYCLE CHECKPOINTS      | <a href="#">Reactome Pathways</a>    | 4.997E-12 | 1.172E-9  | 9.514E-9  | 9.380E-9   | <a href="#">26</a> | <a href="#">291</a> |
| 9       | MM15388 | REACTOME CELL CYCLE CHECKPOINTS      | <a href="#">Reactome Pathways</a>    | 3.169E-10 | 6.609E-8  | 5.363E-7  | 5.948E-7   | <a href="#">23</a> | <a href="#">274</a> |
| 10      | M1040   | REACTOME G1 S SPECIFIC TRANSCRIPTION | <a href="#">Reactome Pathways</a>    | 8.037E-10 | 1.508E-7  | 1.224E-6  | 1.508E-6   | <a href="#">9</a>  | <a href="#">29</a>  |
| 11      | M27627  | REACTOME ANTIMICROBIAL PEPTIDES      | <a href="#">Reactome Pathways</a>    | 1.147E-9  | 1.958E-7  | 1.589E-6  | 2.154E-6   | <a href="#">14</a> | <a href="#">98</a>  |
| 12      | MM14635 | REACTOME CELL CYCLE                  | <a href="#">Reactome Pathways</a>    | 2.756E-9  | 4.311E-7  | 3.498E-6  | 5.173E-6   | <a href="#">33</a> | <a href="#">600</a> |
| 13      | M39678  | WP RETINOBLASTOMA GENE IN CANCER     | <a href="#">WikiPathways</a>         | 3.453E-9  | 4.985E-7  | 4.045E-6  | 6.481E-6   | <a href="#">13</a> | <a href="#">89</a>  |

|    |         |                                                                  |                                   |          |          |          |          |                    |                     |
|----|---------|------------------------------------------------------------------|-----------------------------------|----------|----------|----------|----------|--------------------|---------------------|
| 14 | M26971  | REACTOME POLO LIKE KINASE MEDIATED EVENTS                        | <a href="#">Reactome Pathways</a> | 3.946E-9 | 5.290E-7 | 4.293E-6 | 7.406E-6 | <a href="#">7</a>  | <a href="#">16</a>  |
| 15 | M808    | REACTOME CYCLIN A B1 B2 ASSOCIATED EVENTS DURING G2 M TRANSITION | <a href="#">Reactome Pathways</a> | 5.498E-9 | 6.450E-7 | 5.234E-6 | 1.032E-5 | <a href="#">8</a>  | <a href="#">25</a>  |
| 16 | MM15379 | REACTOME CYCLIN A B1 B2 ASSOCIATED EVENTS DURING G2 M TRANSITION | <a href="#">Reactome Pathways</a> | 5.498E-9 | 6.450E-7 | 5.234E-6 | 1.032E-5 | <a href="#">8</a>  | <a href="#">25</a>  |
| 17 | M176    | PID FOXM1 PATHWAY                                                | <a href="#">PID Pathways</a>      | 1.862E-8 | 2.056E-6 | 1.669E-5 | 3.496E-5 | <a href="#">9</a>  | <a href="#">40</a>  |
| 18 | M19381  | REACTOME G2 M CHECKPOINTS                                        | <a href="#">Reactome Pathways</a> | 1.772E-7 | 1.848E-5 | 1.500E-4 | 3.326E-4 | <a href="#">15</a> | <a href="#">167</a> |
| 19 | M532    | REACTOME G0 AND EARLY G1                                         | <a href="#">Reactome Pathways</a> | 2.608E-7 | 2.577E-5 | 2.091E-4 | 4.896E-4 | <a href="#">7</a>  | <a href="#">27</a>  |
| 20 | M129    | PID PLK1 PATHWAY                                                 | <a href="#">PID Pathways</a>      | 9.728E-7 | 9.130E-5 | 7.409E-4 | 1.826E-3 | <a href="#">8</a>  | <a href="#">46</a>  |
